# Supplementary material
Source: Elsevier journal article supplement (https://www.sciencedirect.com/science/article/pii/S0300289612001226)
Supplement: mmc1 [file S0300289612001226:mmc1.doc]

**Apéndice**: Cuestionario completo del estudio CONOCEPOC

**CUESTIONARIO**

*Buenos días, le llamo de un gabinete de investigación. Estamos realizando un estudio sobre salud de la población española. ¿Le importaría que le hiciéramos unas breves preguntas?, no le llevarán más de 10 minutos. Muchas gracias.*

DATOS SOCIODEMOGRÁFICOS

¿Podría indicar…

S1.- qué edad tiene? _________

< 40 años *** Finalizar entrevista.***

40-50 años

51-60 años

61-70 años

>70 años

S2. - y su peso? __________Kg.

S3. - cuánto mide? ________ metros.

S4.- Sexo *(anotar sin preguntar en función del nombre -si es posible-)*:

Hombre

Mujer

S6.- CCAA[[1]](#footnote-2)*:

| Andalucía | Aragón |
| --- | --- |
| Asturias | C. Madrid |
| Canarias | Cantabria |
| Castilla-La Mancha | Castilla-León |
| Cataluña | Extrem adura |
| Galicia | Islas Baleares |
| La Rioja | Navarra |
| País Vasco | R. Murcia |
| Valencia |  |
|  |  |

S7.- Hábitat*:

 10.000 habitantes

> 10.000 habitantes

CONOCIMIENTO - DIAGNÓSTICO EPOC

C1.- ¿Podría indicar, en una escala del 0 (muy malo) al 10 (muy bueno), cómo considera su estado de salud? └┴┘

C2.- ¿Padece actualmente alguna enfermedad respiratoria?

Sí * Ir a C3.*

No * Ir a C4.*

Ns/Nc* Ir a C4.*

Conocimiento espontáneo

C3.- ¿Podría indicar cuál o cuáles? *(****No*** *leer opciones)*

EPOC (Enfermedad Pulmonar Obstructiva Crónica)

Asma

Bronquitis aguda

Bronquitis crónica

Neumonía

Rinitis

Faringitis

Enfisema

Resfriado / gripe

Otras

*Si* ***no*** *indica EPOC en C3 responder a C4. Si indica EPOC en C3 ir a C5.*

C4.- ¿Sabe qué es la EPOC (Enfermedad Pulmonar Obstructiva Crónica)?

Sí ¿Cuáles son sus principales síntomas? (no leer)

□ Tos matutina □ Pitos al respirar □ Expectoración

□ Ahogo □ Otros

No (pasar a C5)

*(Leer) Como sabrá, la EPOC es una enfermedad pulmonar obstructiva crónica que engloba un conjunto de patologías como bronquitis crónica y enfisema y que se caracteriza por, sensación de ahogo, tos, pitos al respirar y cansancio provocada por el consumo de tabaco.*

*C5.-* ¿la conoce ahora? □ No □ Sí

C6.- ¿a través de qué medio la conoce?

□ Medios de comunicación (prensa, radio, Tv)

□ Médicos

□ Farmacéutico

□ Familiar/ conocido que la padece

□ Otros

Consultar **sólo** sobre las que **no** se hayan mencionado en C3.

C5.- ¿Le ha sido diagnosticada alguna de las siguientes enfermedades?

Sí No No sabe

EPOC

Asma

Bronquitis aguda

Bronquitis crónica

Neumonía

Rinitis

Faringitis

Enfisema

*Si* ***no*** *indica EPOC en C3* ***y*** *C5 ir a E1.*

TRATAMIENTO de la EPOC *(Sólo si indica* ***EPOC*** *en C3 o C5)*

T1.- ¿Sigue tratamiento para la EPOC?

□ No

□ Sí ** T2. Especificar tratamiento *(leer opciones)*:

□ Dejar de fumar (especificar):

¿le han propuesto un tratamiento de apoyo para dejar de fumar (pastillas, parches, etc.) □ No □ Sí

□ Medicamentos

□ Ejercicio / rehabilitación

□ Oxigeno

□ Otro

T2.- ¿Cuál es el síntoma que más le preocupa o molesta en relación a su EPOC?

                □ Tos     □ Pitos al respirar     □ Expectoración     □ Ahogo     □ Otros

T3.- ¿Alguno de estos síntomas de la EPOC le molesta para su descanso nocturno?

□ No     □ Sí (especificar cómo): Respuesta múltiple.

                                   □ Me despierto muchas veces por la noche

                                   □ Me levanto por las mañanas cansado

                                   □ Tengo sueño de mala calidad

                                   □ Otros

T4.- Cuando su EPOC empeora, (por ejemplo tiene más tos, ahogo, o aumento o cambio en el esputo) ¿acude al médico?

□ No     □ Solo si me encuentro muy mal o tengo fiebre     □ Sí

CARACTERÍSTICAS de la EPOC (todos los encuestados)

P1.- ¿Usted fuma?

□ Sí, Fumador P.1.1.1.- ¿Cuántos cigarros fuma al día? _________

P.1.1.2.- ¿Cuántos años hace que fuma? _________

P.1.1.3.- ¿Ha intentado dejar de fumar en alguna ocasión?

□ Sí  P1.1.4.- ¿Cuántas veces? _____________

□ No

□ No, Exfumador P.1.2.1 Lo dejó hace

□ menos de 6 meses □ más de 6meses

P.1.2.2.- ¿Cuántos cigarros fumaba al día? ________

P.1.2.3.- ¿Cuántos años ha fumado? ____________

□ No, nunca ha fumado

P2.- ¿Al menos hace 2 años sufre tos matutina, de forma más o menos ininterrumpida, por más de 3 meses al año?

□ Sí □ No

P3.- ¿Al menos hace 2 años sufre tos con expectoración (tos con esputo), de forma más o menos ininterrumpida, por más de 3 meses al año?

□ Sí □ No

P4.- ¿presenta pitos o ruidos al respirar, de forma más o menos ininterrumpida, por más de tres meses al año?

□ Sí □ No

P5.- ¿Siente sensación consciente de falta de aire (dificultad para coger aire más que para expulsarlo)? *(Leer opciones)*

□ No

□ Al subir una cuesta o dos pisos

□ Al subir un piso

□ Al andar en llano

□ En reposo

*Si ha indicado algunos de los síntomas siguientes: Sí en P2, P3, P4 o* ***no*** *ha indicado No en P5*

P5.- ¿Ha consultado a su médico por estos problemas? *(citar en caso necesario tos, tos con esputo y/o falta de aire, según lo respondido)*

□ No

□ Sí (especificar):

¿Con quién?

□ médico de cabecera

□ especialista de los pulmones

¿Le han realizado alguna vez una espirometría (soplar por un aparato)?

□ No □ Sí

PERCEPCIÓN de la EPOC

F1.- ¿Podría indicar, en una escala del 0 (ausencia gravedad) al 10 (máxima gravedad), cómo considera de grave la EPOC? _________

F2.- ¿Sería tan amable de indicar en una escala del 0 (ausencia gravedad) al 10 (máxima gravedad) cómo considera cada una de las siguientes enfermedades?

Diabetes……………. _____

Hipertensión……….. _____

Angina de pecho….. _____

Úlcera de estómago

Artrosis-Artritis……… _____

F3.- Desde el 2 de enero de este año tenemos una nueva Ley Antitabaco en España, que no permite fumar en lugares públicos cerrados, entre otros cambios. Su actitud respecto a esta nueva ley es:

□ Muy favorable

□ Favorable

□ No sabe

□ Desfavorable

□ Muy desfavorable

F4.- ¿Conoce que existe una Estrategia Nacional de la EPOC?

□ No □ Sí

**Muchas gracias por su colaboración**

1. * Se dispone de esta información en la BBDD de teléfonos de población general. [↑](#footnote-ref-2)
